# Supplementary material for: Defective protein repair under methionine sulfoxide A deletion drives autophagy and ARE-dependent gene transcription
Source: PubMed Central journal article supplement — Redox Biol. 2018 Apr 3;16:401–13. doi: 10.1016/j.redox.2018.04.001 (PMC5953240; doi:10.1016/j.redox.2018.04.001), 2018-04-03
Supplement: mmc1.pdf [file mmc1.pdf]

| <b>Supplemental table 1</b>      |                                                                                                                                                             |
|----------------------------------|-------------------------------------------------------------------------------------------------------------------------------------------------------------|
| <b>Gene</b>                      | <b>Primer sequence</b>                                                                                                                                      |
| <b>MsrA genotype for MsrA+/+</b> | Forward 5'-ACG CTT CTT CAT TCA GCT AAC-3'<br>Reverse 5'-TCA CAC CCA TCT GAG ACT TCC CC-3'                                                                   |
| <b>Neo genotype for MsrA-/-</b>  | Forward 5'-GTG TTC CGG CTG TCA GCG CA-3'<br>Reverse 5'-GTC GTG ATA GCG GTC CGC CA-3'                                                                        |
| <b>Nrf2 genotype</b>             | Forward 5'- GCC TGA GAG CTG TAG GCC C-3'<br>Reverse 5'- GGA ATG GAA AAT AGC TCC TGC C-3' (wild type)<br>Reverse 5'- GAC AGT ATC GGC CTC AGG AA -3' (mutant) |
| <b>ARP qPCR</b>                  | Forward 5'-TCA TCC AGC AGG TGT TTG ACA A-3'<br>Reverse 5'-ATT GCG GAC ACC CTC TAG GAA-3'                                                                    |
| <b>GCLC qPCR</b>                 | Forward 5'-ACA TCG CCT CCA TTC AGT AAC-3'<br>Reverse 5'-ACA TCT ACC ACG CAG TCA AG-3'                                                                       |
| <b>Nrf2 qPCR</b>                 | Forward 5'-TCA AAC ACT TCT CGA CTT ACT CC-3'<br>Reverse 5'-TGA TGG ACT TGG AGT TGC C-3'                                                                     |
| <b>GR qPCR</b>                   | Forward 5'-AGC ATC TCA TCA CAG CCA ATC-3'<br>Reverse 5'-TCT ACT CGA CTG CCT TTA CCC-3'                                                                      |
| <b>p62 qPCR</b>                  | Forward 5'-TGT CGT AAT TCT TGG TCT GTA GG-3'<br>Reverse 5'-TGC CCT ATA CCC ACA TCT CC-3'                                                                    |

Primers for genotyping or quantitative PCR (qPCR).
